# Supplementary material for: Investments in Pinus elliottii Engelm. Plantations: Real Options Analysis in Discrete Time
Source: MDPI journal article supplement (doi:10.3390/f13010111), 2022-01-12
Supplement: s1 [file s1]

**Table S1** Components of costs, year of occurrence, and monetary values of silvicultural practices and inputs in the investment projects

| Cash Flow Components                                                           | Years of occurrence | Values |
|--------------------------------------------------------------------------------|---------------------|--------|
| Mean Annual Increment (MAI) ( $\text{m}^3 \text{ ha}^{-1} \text{ year}^{-1}$ ) | 21                  | 21.00  |
| Planted area (ha)                                                              | 0                   | 1.00   |
| Planted trees ( $\text{ha}^{-1}$ )                                             | 0                   | 1111   |
| Thinning (%)                                                                   | 8                   | 25%    |
| Wood production – pruning/thinning ( $\text{m}^3 \text{ ha}^{-1}$ )            | 8                   | 62.09  |
| Wood production – clear-cutting ( $\text{m}^3 \text{ ha}^{-1}$ )               | 21                  | 679.14 |
| Production of resin tree <sup>-1</sup> ( $\text{kg year}^{-1}$ )               | 10-20               | 4.50   |
| Resin ( $\text{t ha}^{-1} \text{ year}^{-1}$ )                                 | 10-20               | 3.80   |
| Wood price – pruning/thinning ( $\text{USD m}^{-3}$ )                          | 8                   | 3.72   |
| Wood price – clear-cutting ( $\text{USD m}^{-3}$ )                             | 21                  | 11.17  |
| Resin price ( $\text{USD t}^{-1}$ )                                            | 10-20               | 822.11 |
| Silvicultural practices                                                        | Years of occurrence | Values |
| Formicide – pre-planting ( $\text{USD ha}^{-1}$ )                              | 0                   | 8.88   |
| Mechanized weed mowing – pre-planting ( $\text{USD ha}^{-1}$ )                 | 0                   | 56.91  |
| Subsoiling ( $\text{USD ha}^{-1}$ )                                            | 0                   | 99.60  |
| Planting of <i>Pinus elliottii</i> seedlings ( $\text{USD ha}^{-1}$ )          | 0                   | 44.39  |
| Formicide ( $\text{USD ha}^{-1}$ )                                             | 1                   | 8.88   |
| Herbicide – mechanized application ( $\text{USD ha}^{-1}$ )                    | 1                   | 28.46  |
| Mowing – mechanized ( $\text{USD ha}^{-1}$ )                                   | 1                   | 28.46  |
| Mowing – manual ( $\text{USD ha}^{-1}$ )                                       | 1                   | 44.39  |
| Replanting ( $\text{USD ha}^{-1}$ )                                            | 1                   | 8.88   |
| Formicide ( $\text{USD ha}^{-1}$ )                                             | 2                   | 8.88   |
| Herbicide – manual application ( $\text{USD ha}^{-1}$ )                        | 2                   | 88.78  |
| Herbicide – mechanized application ( $\text{USD ha}^{-1}$ )                    | 2                   | 56.91  |
| Herbicide – manual application ( $\text{USD ha}^{-1}$ )                        | 3                   | 88.78  |
| Herbicide – mechanized application ( $\text{USD ha}^{-1}$ )                    | 3                   | 56.91  |
| Formicide ( $\text{USD ha}^{-1}$ )                                             | 3                   | 8.88   |
| Herbicide – manual application ( $\text{USD ha}^{-1}$ )                        | 4                   | 44.39  |
| Herbicide – mechanized application ( $\text{USD ha}^{-1}$ )                    | 4                   | 28.46  |
| Pruning/thinning ( $\text{USD ha}^{-1}$ )                                      | 8                   | 88.78  |
| Inputs                                                                         | Years of occurrence | Values |
| Formicide – product ( $\text{USD ha}^{-1}$ )                                   | 0                   | 4.64   |
| Seedlings – planting ( $\text{USD ha}^{-1}$ )                                  | 0                   | 137.84 |
| Formicide – product ( $\text{USD ha}^{-1}$ )                                   | 1                   | 4.64   |
| Herbicide – product ( $\text{USD ha}^{-1}$ )                                   | 1                   | 17.07  |
| <i>Pinus elliottii</i> seedlings – replanting ( $\text{USD ha}^{-1}$ )         | 1                   | 13.77  |
| Formicide – product ( $\text{USD ha}^{-1}$ )                                   | 2                   | 4.64   |
| Herbicide – product ( $\text{USD ha}^{-1}$ )                                   | 2                   | 34.15  |
| Formicide – product ( $\text{USD ha}^{-1}$ )                                   | 3                   | 4.64   |
| Herbicide – product ( $\text{USD ha}^{-1}$ )                                   | 3                   | 34.15  |
| Herbicide – product ( $\text{USD ha}^{-1}$ )                                   | 4                   | 17.07  |

| Other costs                                       | Years of occurrence | Values   |
|---------------------------------------------------|---------------------|----------|
| Maintenance of firebreaks (USD ha <sup>-1</sup> ) | 1-21                | 34.15    |
| Resin extraction costs (USD ha <sup>-1</sup> )    | 10-20               | 1,874.97 |
| Land purchase cost (USD ha <sup>-1</sup> )        | -                   | 4,340.54 |
| Land lease cost (USD ha <sup>-1</sup> )           | 1                   | 173.69   |
| Land lease cost (USD ha <sup>-1</sup> )           | 2                   | 186.81   |
| Land lease cost (USD ha <sup>-1</sup> )           | 3                   | 200.91   |
| Land lease cost (USD ha <sup>-1</sup> )           | 4                   | 216.08   |
| Land lease cost (USD ha <sup>-1</sup> )           | 5                   | 232.39   |
| Land lease cost (USD ha <sup>-1</sup> )           | 6                   | 249.94   |
| Land lease cost (USD ha <sup>-1</sup> )           | 7                   | 268.81   |
| Land lease cost (USD ha <sup>-1</sup> )           | 8                   | 289.10   |
| Land lease cost (USD ha <sup>-1</sup> )           | 9                   | 310.93   |
| Land lease cost (USD ha <sup>-1</sup> )           | 10                  | 333.41   |
| Land lease cost (USD ha <sup>-1</sup> )           | 11                  | 359.66   |
| Land lease cost (USD ha <sup>-1</sup> )           | 12                  | 386.81   |
| Land lease cost (USD ha <sup>-1</sup> )           | 13                  | 416.01   |
| Land lease cost (USD ha <sup>-1</sup> )           | 14                  | 447.42   |
| Land lease cost (USD ha <sup>-1</sup> )           | 15                  | 481.20   |
| Land lease cost (USD ha <sup>-1</sup> )           | 16                  | 517.53   |
| Land lease cost (USD ha <sup>-1</sup> )           | 17                  | 556.61   |
| Land lease cost (USD ha <sup>-1</sup> )           | 18                  | 598.63   |
| Land lease cost (USD ha <sup>-1</sup> )           | 19                  | 643.8    |
| Land lease cost (USD ha <sup>-1</sup> )           | 20                  | 692.44   |
| Land lease cost (USD ha <sup>-1</sup> )           | 21                  | 744.72   |
| Overhead (USD ha <sup>-1</sup> )                  | 1-21                | 59.00    |
